# Supplementary material for: Elimination of human rabies in Goa, India through an integrated One Health approach
Source: PubMed Central journal article supplement (PMC9120018; doi:10.1038/s41467-022-30371-y), 2022-05-19
Supplement: 41467_2022_30371_MOESM2_ESM.pdf [file 41467_2022_30371_MOESM2_ESM.pdf]

## **Description of Additional Supplementary Files**

File Name: Supplementary Data 1

Description: Logistic regression model data set

File Name: Supplementary Data 2

Description: Phylogenetic sample data set

File Name: Supplementary Data 3

Description: RabiesEcon model

File Name: Supplementary Software 1

Description: R code for Logistical Regression analysis

File Name: Supplementary Software 2

Description: R code for Spatio-temporal analysis
